# Supplementary material
Source: Springer Nature journal article supplement (https://www.springermedizin.de/resource/supplementary/13045_2008_52_MOESM1_ESM.pdf/9660554)

Glycoprotein  
 Mannoprotein  
 $\beta$ -Glucan  
 Chitin  
 Mannoprotein  
 Plasma membrane

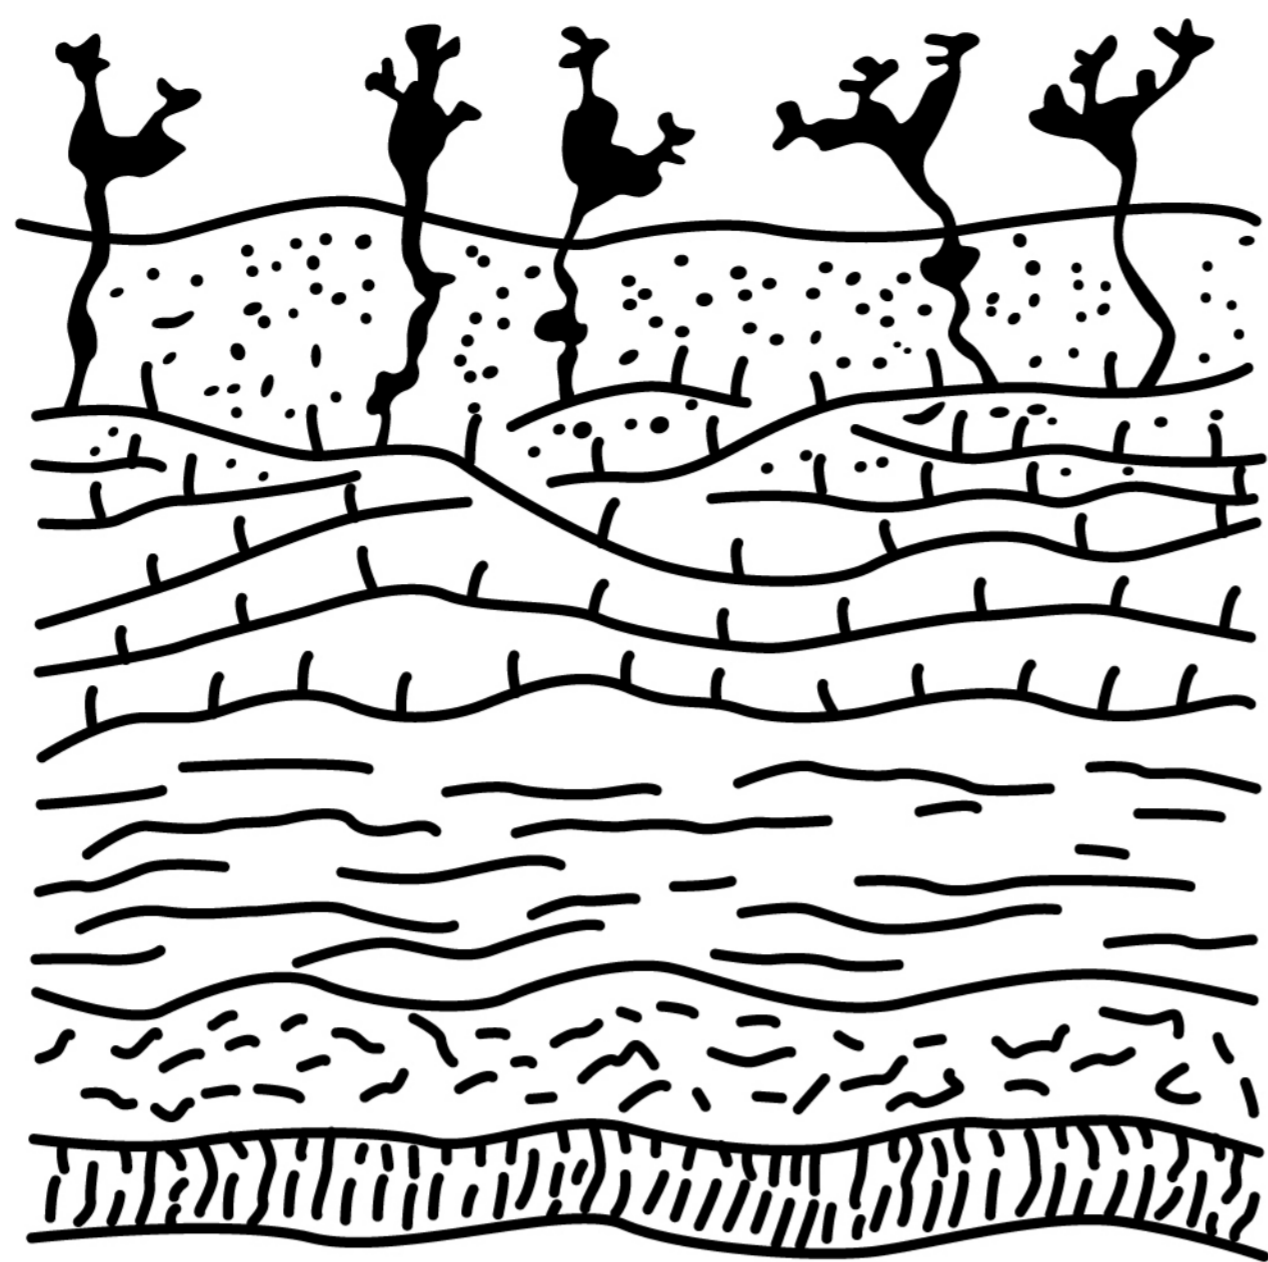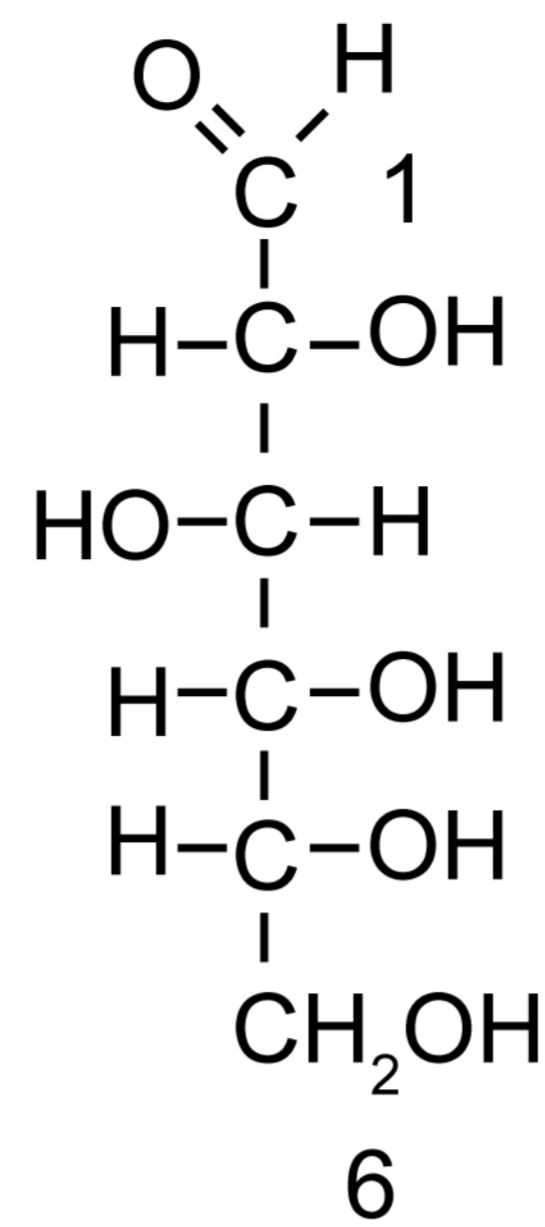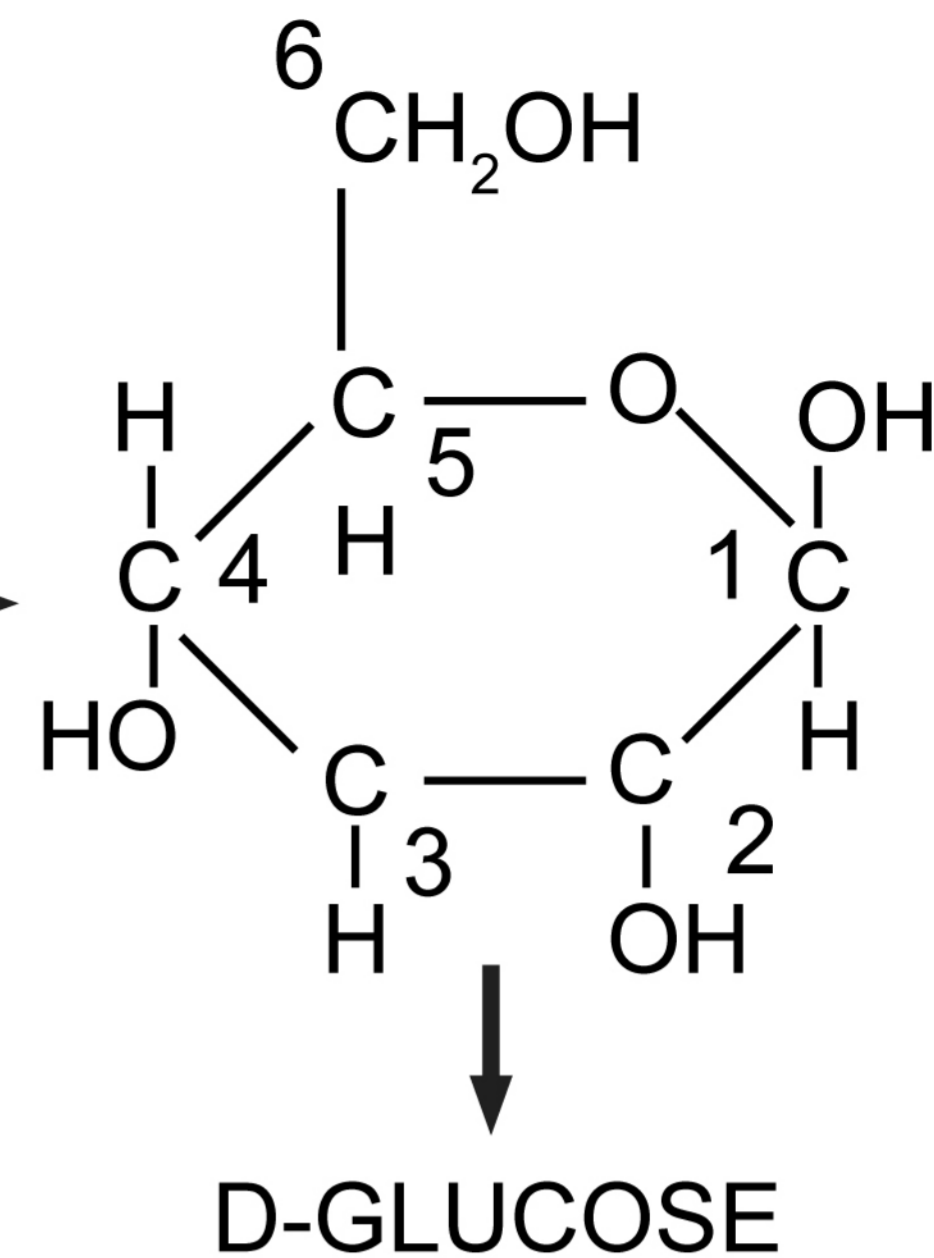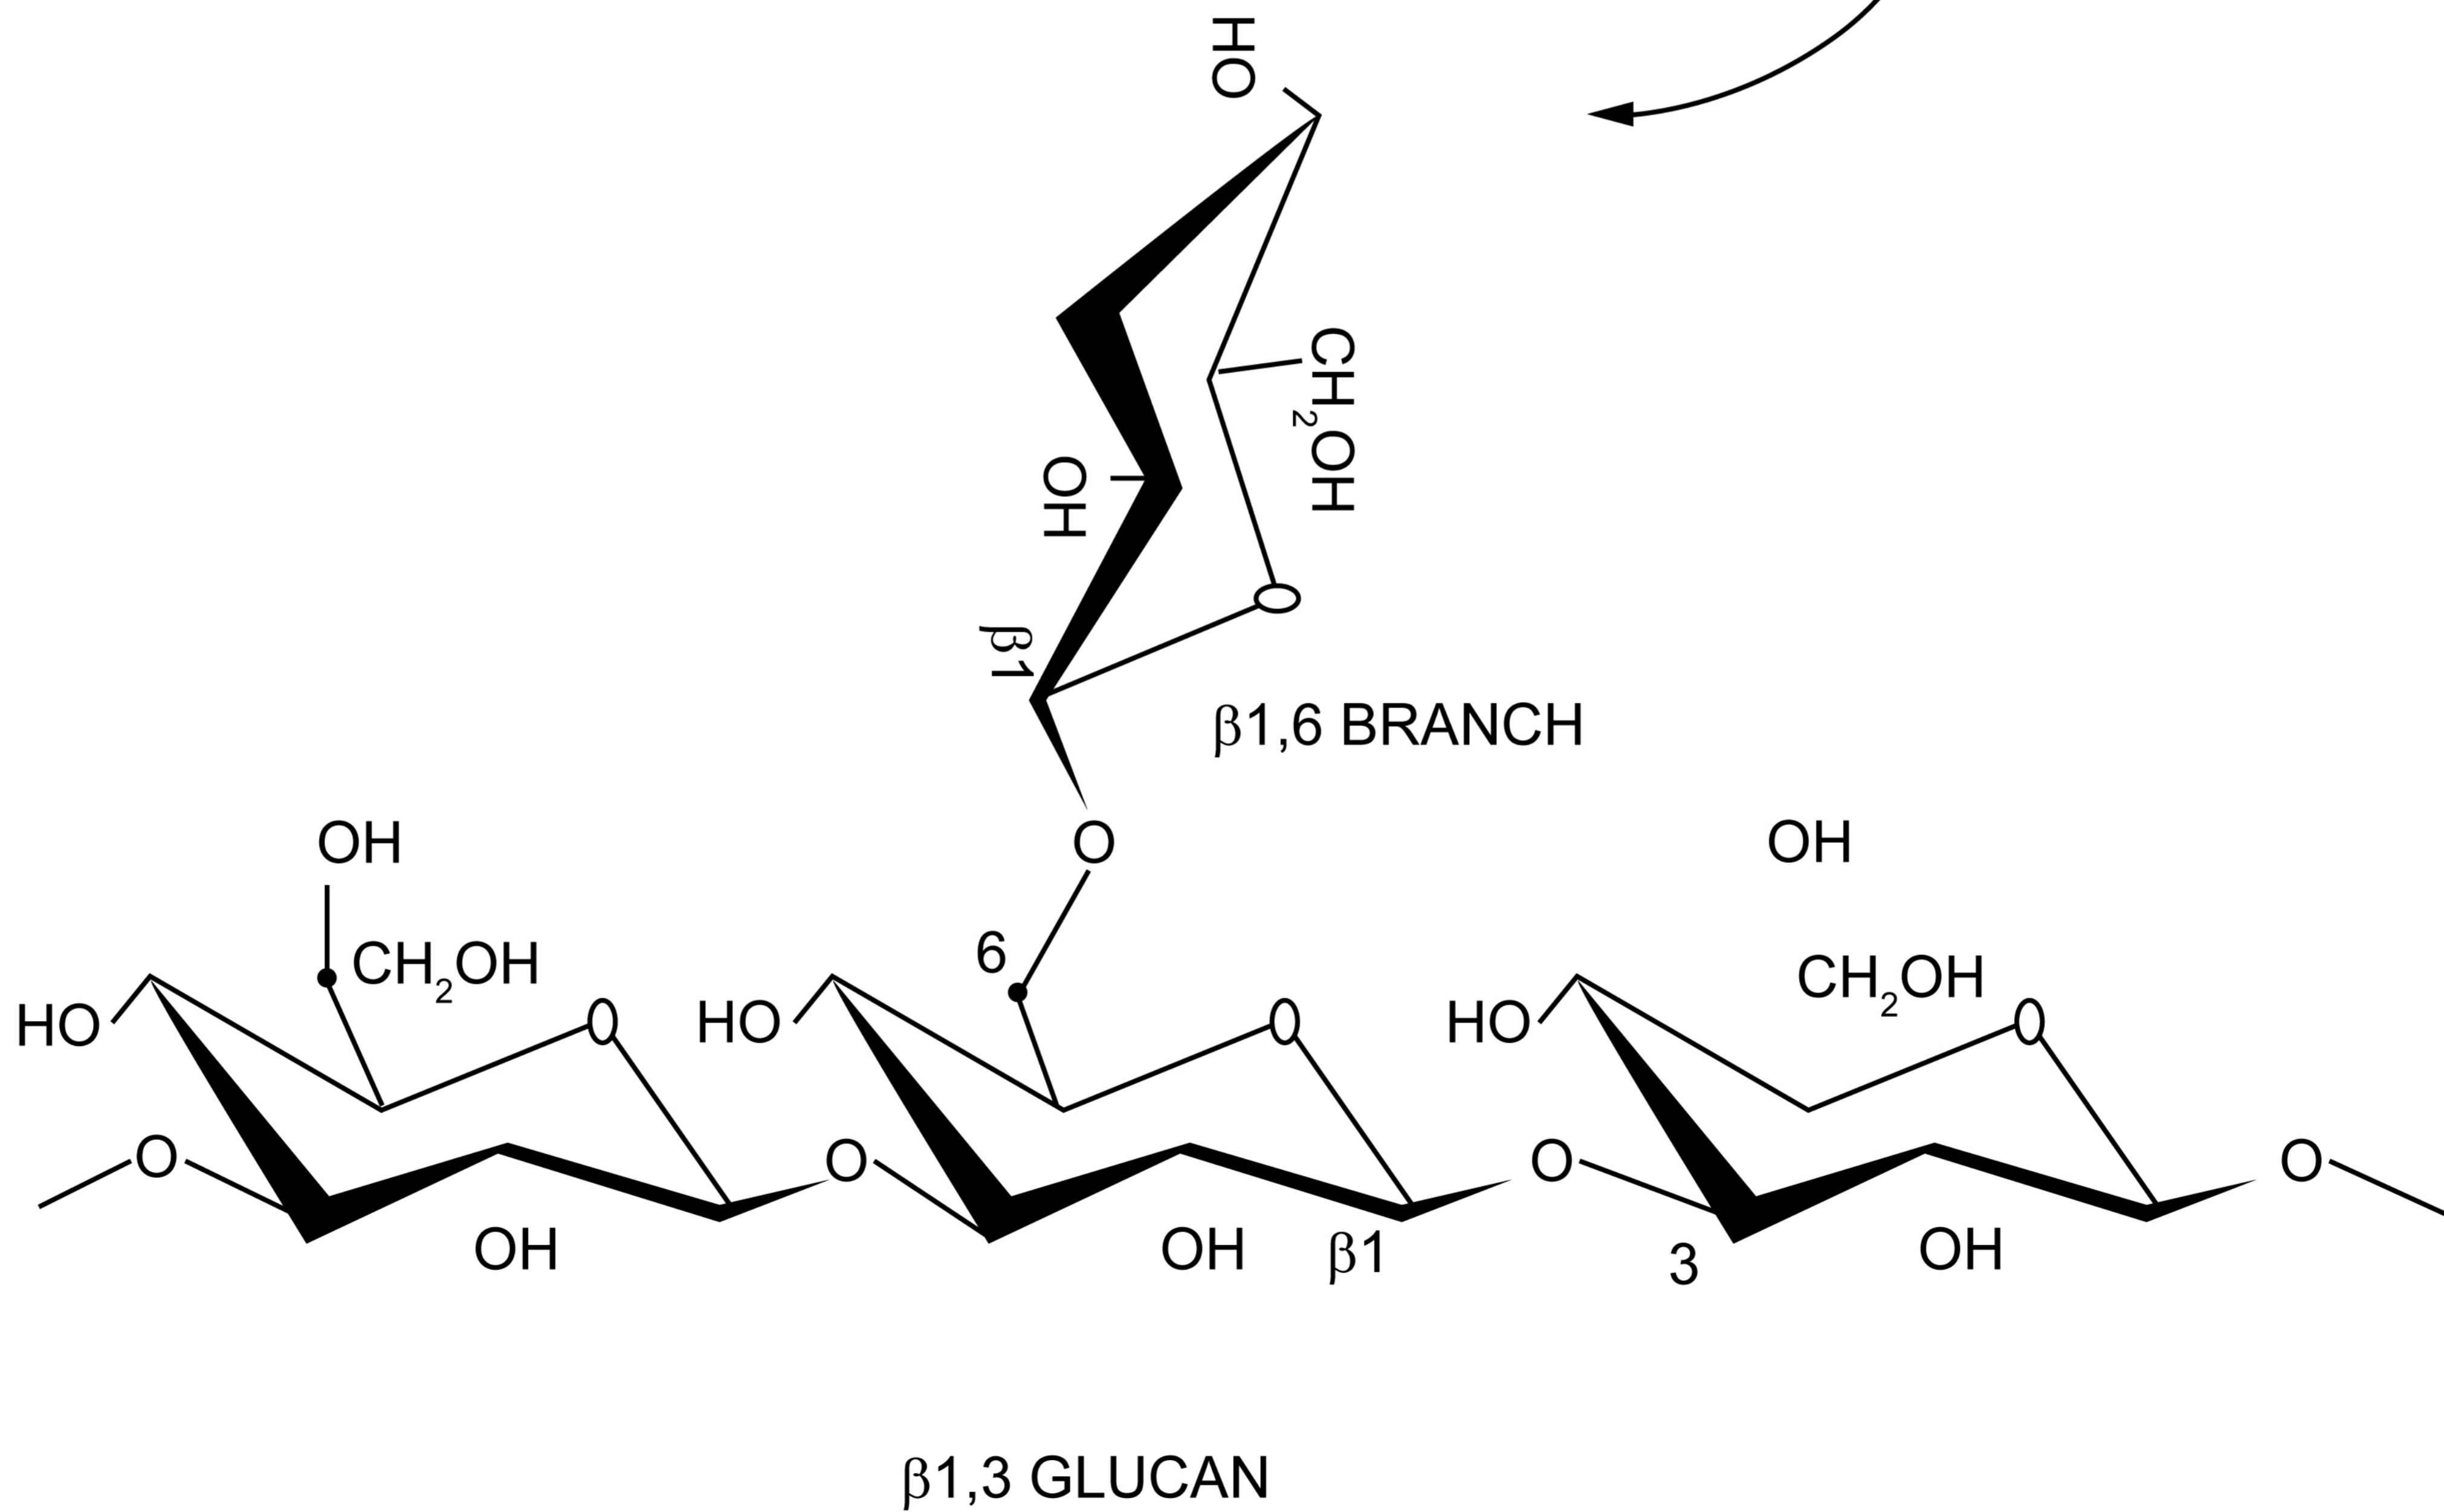

Supplement: MOESM1 [file 9660554]
